# Effect of cannabidiol on apoptosis and cellular interferon and interferon-stimulated gene responses to the SARS-CoV-2 genes *ORF8*, *ORF10* and *M protein*

Maria Fernanda Fernandes<sup>1</sup>, John Zewen Chan<sup>1</sup>, Chia Chun Joey Hung<sup>1</sup>, Michelle Victoria Tomczewski<sup>1</sup>, and Robin Elaine Duncan<sup>1\*</sup>

<sup>1</sup>University of Waterloo, Department of Kinesiology and Health Sciences, Faculty of Health, 200 University Ave W, BMH 1044, Waterloo, ON, N2L 3G1 Canada

\* Corresponding author

E-mail: [reduncan@uwaterloo.ca](mailto:reduncan@uwaterloo.ca)

Tel: 1-519-888-4567 x 38591

**Word count:** 9494

**Figures:** 5

**Tables:** 1

**Keywords:** coronavirus disease 2019 (COVID-19), severe acute respiratory syndrome coronavirus 2 (SARS-CoV-2), ORF8, ORF10, M protein, apoptosis, interferons, innate immunity, 2'-5'-oligoadenylate synthetase (OAS) family

**Declaration of Conflicting Interests:** MFF was a recipient of a Mitacs Accelerate Post-doctoral fellowship award that was funded in part (33%) by Akseera Pharma Corp. MFF and RED are co-inventors on international applications under the Patent Cooperation Treaty entitled "Interaction of Sars-Cov-2 proteins with molecular and cellular mechanisms of host cells and formulations to

25    treat COVID-19” (PCT/IN2021/050325 and PCT/N2021/050699). Akseera Pharma Corp. was  
26    not involved in the conceptualization, design, data collection, analysis, decision to publish, or  
27    preparation of the manuscript.

28

29

# Abstract

**Aims:** To study effects on cellular innate immune responses to novel genes *ORF8* and *ORF10*, and the more conserved *Membrane protein (M protein)* from the Severe acute respiratory syndrome coronavirus 2 (SARS-CoV-2) that causes COVID-19, either alone, or in combination with cannabidiol (CBD).

**Main Methods:** HEK293 cells were transfected with a control plasmid, or plasmids expressing *ORF8*, *ORF10*, or *M protein*, and assayed for cell number and markers of apoptosis at 24 h, and expression of interferon and interferon-stimulated genes at 14 h.

**Key findings:** A significant reduction in cell number, and increase in early and late apoptosis, was found after 24 h in cells where expression of viral genes was combined with 1-2  $\mu$ M CBD treatment, but not in control-transfected cells treated with CBD, or in cells expressing viral genes but treated only with vehicle. CBD (2  $\mu$ M) augmented expression of *IFN $\gamma$* , *IFN $\lambda$ 1* and *IFN $\lambda$ 2/3*, as well as the 2'-5'-oligoadenylate synthetase (OAS) family members *OAS1*, *OAS2*, *OAS3*, and *OASL*, in cells expressing *ORF8*, *ORF10*, and *M protein*. CBD also augmented expression of these genes in control cells not expressing viral genes, without enhancing apoptosis.

**Significance:** Our results demonstrate a poor ability of HEK293 cells to respond to SARS-CoV-2 genes alone, but suggest an augmented innate anti-viral response to these genes in the presence of CBD. Furthermore, our results indicate that CBD may prime components of the innate immune system, increasing readiness to respond to viral infection without activating apoptosis, and therefore could be studied for potential in prophylaxis.

## 1. Introduction

Coronavirus disease 2019 (COVID-19) is caused by the Severe Acute Respiratory Syndrome Coronavirus 2 (SARS-CoV-2) that was first detected in humans in that year [1]. At the time of writing, the number of cases of COVID-19 is approaching 250 million globally [2], and a number of SARS-CoV-2 variants have emerged and spread between continents [3-8]. Although an effective vaccine is the ultimate goal, efforts to slow the spread, reduce transmission and infectivity, improve health outcomes, and mitigate the most serious health impacts of this disease, will require a multi-faceted approach to reduce the medical, social, and economic burdens of COVID-19. In this regard, the development of effective therapeutics and prophylactics will be key to any effective global health strategy and are urgently needed.

The SARS-CoV-2 genome has been sequenced [9], and found to share significant homology with the genome of SARS-CoV-1, the virus that caused a deadly outbreak of respiratory disease shortly after the turn of the millennium [10]. This homology is fortunate, since prior genomic translational studies, and studies on the cellular function of SARS-CoV-1 viral proteins, have provided some insight into the nature of many of the proteins that function to create the SARS CoV-2 pathogen, and cause COVID-19. However, the SARS-CoV-2 genome has been found to code for an additional novel protein, open reading frame 10 (ORF10) protein, that was not encoded in the SARS-CoV-1 genome, and therefore a function for this protein cannot be inferred from prior work [10]. Studies on this protein have suggested that it is not necessary for virulence or infectivity [11], although sequence analysis indicates that it contains multiple cytotoxic T lymphocyte epitopes [12]. While it is known to be mutated in variants found in humans [13], the function of ORF10 has not yet been elucidated [14].

In addition to ORF10, other proteins encoded by the SARS-CoV-2 genome are yet poorly understood. The ORF8 protein corresponds to two different proteins in SARS-CoV-1, ORF8a and ORF8b, with which it shares only 38.9% and 44.4% sequence identity, respectively, and which differ significantly in protein structure [15]. The role of ORF8 has been suggested to be ‘involvement in host immune evasion’ [15, 16]. However, studies have variably reported that SARS-CoV-2 variants with deletions leading to a deficiency of ORF8 have no difference in infectivity versus wildtype virus [17], or cause milder infections [18], or may combine with additional spike protein mutations to increase transmissibility [19]. Experimental studies on effects of ORF8 in cells also report diverse findings, including the initiation of endoplasmic reticulum stress [20], and evidence of a role in driving the cytokine storm through activation of the interleukin (IL)-17 pathway [21]. With regards to evidence of a role in host immune evasion, studies report inhibitory effects of ORF8 on the induction of Type I interferons (IFN), particularly IFN- $\beta$  [15, 22]. This is notable in the context of COVID-19, since disrupted innate intracellular anti-viral host defenses are specifically implicated in the pathogenesis of this disease [23].

Unlike adaptive immunity, which is mediated by specialized cells of the immune system, essentially all cells are capable of mounting an innate immune response (although the innate immune response functions, in part, to activate adaptive immunity) [24]. The innate immune response can be initiated by cellular entry of viruses or viral components, such as viral RNA or capsid proteins, which are recognized by host pattern recognition receptors that, in turn, trigger signaling cascades leading to the production of host defense molecules including IFNs [24]. However, viruses frequently evolve strategies to disrupt IFN-mediated signaling, and this is reportedly also a function of several non-structural proteins in the SARS-CoV-2 genome [23].

Type I IFN include IFN $\alpha$  and IFN $\beta$ , and are among the earliest cytokines produced during the innate immune response following viral infection of cells [25]. While the functions of Type I IFN are complex and can vary throughout an infection, they tend to act initially in the recruitment of immunocytes to promote activation of the acquired host immune response, inhibit proliferation of infected cells, and limit viral replication [25]. Type II IFN, or IFN $\gamma$ , is involved in macrophage and neutrophil activation, and an absence of this factor results in increased virus replication and decreased survival of mice infected with herpes simplex virus type 2 [26]. Type III, or  $\lambda$ -type IFN (IFN $\lambda$ ) are comprised of IFN $\lambda$ 1, and IFN $\lambda$ 2/IFN $\lambda$ 3, which are ~95% homologous, and IFN $\lambda$ 4 (although expression of this homologue is suppressed at the mRNA or protein level, so it is typically not detected) [27].

While Type III IFN perform similar roles to Type I IFN and were initially thought to be redundant, they are now recognized to be more pro-apoptotic than Type I or Type II IFN [28]. Lambda-type IFN are of significant interest in COVID-19 as a result of evidence showing their greater efficacy at controlling SARS-CoV-2 replication and spread compared to Type I IFN [29], as well as evidence indicating an inverse correlation between Type III IFN levels and severity of COVID-19 [30]. Among the Type III IFN-stimulated genes (ISG) that act as down-stream effectors to induce apoptosis are the 2'-5'-oligoadenylate synthetase (OAS) family members [31, 32]. OAS proteins act as sensors of cytosolic double-stranded RNA produced when viruses replicate, interacting with and activating RNase L after encountering this viral product [33]. RNase L halts viral replication and viral gene translation by cleaving viral protein-encoding RNAs, and also disrupts the host cell transcriptome by degrading cellular rRNAs and tRNAs [33], promoting apoptosis [34, 35]. This strategy can be highly protective in limiting the initiation and spread of an initial infection [36-38]. Although this system is activated in cells infected with SARS-CoV-2, that

activation is weak, in contrast to the activation observed in cells infected with other beta-coronaviruses such as SARS-CoV-1 and Middle East Respiratory Syndrome (MERS-CoV) [39]. Pharmacological strategies to increase activation of the OAS-RNase L pathway have thus been suggested as a priority in COVID-19 [40]. This is strongly supported by findings that a polymorphism in a Neanderthal-lineage variant of the *OAS1* gene inherited by some Europeans is associated with higher circulating levels of OAS1 in the non-infected state, and with significant reductions in the risk of COVID-19 susceptibility (odds ratio (OR) = 0.78), hospitalization (OR = 0.61), and ventilation or death (OR = 0.54) following infection [40].

In the current work, we have undertaken studies to examine the effects of expression of *ORF8* and *ORF10* genes, as well as the SARS-CoV-2 structural *Membrane (M) protein*, which is reported to inhibit Type I and III IFN responses [41], on apoptosis and expression of IFNs and down-stream effectors. In addition to examining the effects of expression of these genes alone, we have also investigated effects of combining their expression with cannabidiol (CBD). CBD is the major non-psychoactive phytocannabinoid constituent of *Cannabis sativa* [42], and has been hypothesized as a potential therapeutic in COVID-19 [43, 44]. Evidence from the literature supports that CBD has anti-inflammatory properties [45] and may have a role as a potential protective agent or therapeutic in cells experiencing metabolic distress, such as that associated with viral infection [42, 46]. Based on this, we hypothesized that SARS-CoV-2 genes would be pro-apoptotic, and that CBD would reverse these effects. Instead, we found a potential role for CBD in augmentation of the innate anti-viral host cell response to the viral genes, with evidence of a role for enhanced *IFN*- and *ISG*-induction. While this was initially unexpected, during preparation of the manuscript, data became available demonstrating that CBD inhibits the infection of cells with SARS-CoV-2, as well as replication of the virus after entry into cells, in association with

augmented host-cell IFN responses [47]. Our work now shows evidence that CBD augments the anti-viral innate immune response to three distinct viral genes with apparently disparate functions, and also that CBD may prophylactically prime the innate anti-viral response of cells, allowing them to be better prepared to respond to viral infection.

## **2. Materials and methods**

### **2.1 Cell culture**

HEK293 (human embryonic kidney) cells were grown in Dulbecco's Modified Eagle's Medium (DMEM) supplemented with 10% fetal bovine serum (FBS) and 100 U/mL penicillin and 100 mg/mL streptomycin, at 37°C with 5% CO<sub>2</sub>. Cells were grown to 80% confluence and then routinely subdivided following trypsin digest, and were used at less than 15 passages. The use of HEK293 cells in this study was approved by the University of Waterloo Research Ethics Board (ORE#42425).

### **2.2 Plasmids, transfections, and treatments**

Plasmids expressing ORF8 protein (YP\_009724396.1) tagged at the C-terminus with 3 x DYKDDDK tag (Ex-NV229-M14), ORF10 protein (YP\_009725255.1) tagged at the C-terminus with 3 x hemagglutinin tag (Ex-NV231-M07), and M protein (YP\_009724393.1) tagged at the C-terminus with green fluorescent protein (Ex-NV225-M03) were from GeneCopoeia (Rockland, MD, U.S.A.). The control plasmid was pCMV-3Tag-3A (pCMV) (Agilent Technologies, Santa Clara, CA, U.S.A.). HEK293 cells were seeded at a density of  $1 \times 10^4$  cells per well in either 96- or 24-well plates and transfected 24 hours later using JetPRIME (Polyplus



Transfection, New York, NY, U.S.A.), according to the manufacturer's instructions. Briefly, for transfection in a 96-well plate, 0.1 µg of plasmid DNA and 0.25 µL jetPRIME reagent were mixed with 5 µL buffer and incubated for 10 min at room temperature. For transfection in a 24-well plate, 0.5 µg of plasmid DNA and 1.25 µL jetPRIME reagent were mixed with 50 µL buffer and incubated for 10 min at room temperature. The incubated solution was diluted in culture medium to a volume of 100 µL (for 96-well plates) or 500 µL (for 24-well plates) and the mixture replaced the culture medium of the cells. Approximately 2-3 h after transfection, cells were treated with either CBD or vehicle (0.1% ethanol) for 24 h. CBD (# ISO60156-1) was purchased from Cedarlane Labs (Burlington, ON, Canada). All work was performed in accordance with a Health Canada approved Cannabis Tracking and Licencing System Research License held by the University of Waterloo (PI: Dr. Robin Duncan).

### **2.3 Crystal violet staining**

Relative cell numbers were quantified using the crystal violet staining method, as previously described [48]. Briefly, HEK293 cells were seeded ( $1 \times 10^4$  cells) in 96-well plates and transfected with the respective plasmids after 24 h, then treated a few hours after transfection with either CBD or vehicle for 24 h. Cells were gently washed with 1x phosphate buffered saline (PBS), fixed with a mixture of 10% methanol (v/v), 10% acetic acid (v/v) and stained with crystal violet (Fisher Scientific, Mississauga, Ontario, Canada), then washed and eluted for measurement of absorbance of the samples using a BioTek Synergy H1 Hybrid Multi-Mode Microplate reader at 595 nm.

### **2.4 Apoptosis assay**

Early and late apoptotic cells were detected using a Kinetic Apoptosis Kit (#ab129817, Abcam, Toronto, Ontario, Canada), according to the manufacturer's instructions. Briefly, cells were seeded ( $1 \times 10^4$  cells) in 96-well plates and allowed to adhere for 24 hours, then transfected and treated with either CBD or vehicle for 24 hours, labelled with Polarity Sensitive Indicator of Viability & Apoptosis (pSIVA™), which detects early/ongoing apoptosis, and with Propidium Iodide (PI), which detects cells that are in late apoptosis. Live cells were maintained at 37° C while fluorescence was recorded at 469/525 nm for the detection of pSIVA and at 531/647 nm for the detection of PI. Results are expressed as an index, with the early apoptosis index calculated as pSIVA absorbance at 525 nm/relative cell number per well, and the late apoptosis index calculated as PI absorbance at 647 nm/relative cell number per well.

## 2.5 *IFN* and *ISG* mRNA expression

qPCR analysis was conducted as we have previously described [49]. Cells were grown in 24 well plates and transfected with either pCMV-3Tag-3A, or plasmids expressing *ORF8*, *ORF10*, or *M protein*, and then treated with either 2 µM CBD or vehicle overnight for 14 h, so that analyses were performed prior to measures of effects on cell number and apoptosis markers. Total RNA was isolated using TRIzol® Reagent (1 ml per well) as described by the manufacturer (Invitrogen, Waltham, MA). Quantification of RNA samples was performed using a Nanodrop 2000 Spectrophotometer (Thermo Fisher, Waltham, MA) that was also used to check for A260/280 ratio as an indicator of quality, and 2 µg of RNA was used to synthesize cDNA via oligo(dT) priming using a High-Capacity cDNA Reverse Transcription kit from Applied Biosystems (Waltham, MS, USA). For the real-time PCR assays, cDNA was diluted 1:4 and 1 µl was added to a master mix with 9 µl of PerfeCTa SYBR® Green supermix (Quanta Bio, Beverly,

MA), 0.5 µl forward and reverse primers (25 µM each) for the targeted gene (please see Table 1 for primer sequences), and 3 µl of ddH<sub>2</sub>O. The cycling conditions for all genes were as follows: 1 cycle of 95°C for 2 min, followed by 49 cycles of 95°C for 10 s, then 60°C for 20 s. Relative expression of the targeted gene was calculated using the  $\Delta\Delta C_t$  method with the  $C_t$  values normalized to glyceraldehyde 3-phosphate dehydrogenase (*GAPDH*).

Table 1: Primer sequences

| Gene primer                            | Sequence (5' - 3')         |
|----------------------------------------|----------------------------|
| <b><i>IFN-alpha</i> - Forward</b>      | GTGAGGAAATACTTCCAAAGAATCAC |
| <b><i>IFN-alpha</i> - Reverse</b>      | TCTCATGATTCTGCTCTGACAA     |
| <b><i>IFN-beta</i> - Forward</b>       | TTCAGTGTGTCAGAAGCTCCTGTGG  |
| <b><i>IFN-beta</i> - Reverse</b>       | CTGCTTAATCTCCTCAGGGATGTCA  |
| <b><i>IFN-gamma</i> - Forward</b>      | TGGCTTTTCAGCTCTGCATC       |
| <b><i>IFN-gamma</i> - Reverse</b>      | CCGCTACATCTGAATGACCTG      |
| <b><i>IFN-lambda 1</i> - Forward</b>   | GAGGCCCCCAAAAAGGAGTC       |
| <b><i>IFN-lambda 1</i> - Reverse</b>   | AGGTTCCCATCGGCCACATA       |
| <b><i>IFN lambda 2-3</i> - Forward</b> | CTGCCACATAGCCCAGTTCA       |
| <b><i>IFN lambda 2-3</i> - Reverse</b> | AGAAGCGACTCTTCTAAGGCATCTT  |
| <b><i>MX1</i> - Forward</b>            | GGCTGTTTACCAGACTCCGACA     |
| <b><i>MX1</i> - Reverse</b>            | CACAAAGCCTGGCAGCTCTCTA     |
| <b><i>IFIT1</i> - Forward</b>          | GGAATACACAACCTACTAGCC      |
| <b><i>IFIT1</i> - Reverse</b>          | CCAGGTCACCAGACTCCTCA       |

|                               |                           |
|-------------------------------|---------------------------|
| <b><i>OAS1</i> - Forward</b>  | GAAGGCAGCTCACGAAACC       |
| <b><i>OAS1</i> - Reverse</b>  | AGGCCTCAGCCTCTTGTG        |
| <b><i>OAS2</i> - Forward</b>  | TTCTGCCTGCACCACTCTTCACGA  |
| <b><i>OAS2</i> - Reverse</b>  | GCCAGTCTTCAGAGCTGTGCCTTTG |
| <b><i>OAS3</i> - Forward</b>  | CCGAAGTGTCTGGGCCTGATCC    |
| <b><i>OAS3</i> - Reverse</b>  | CCCATTCCCCAGGTCCCATGTGG   |
| <b><i>OASL</i> - Forward</b>  | GACGAAGGCTTCACCACTGT      |
| <b><i>OASL</i> - Reverse</b>  | GTCAAGTGGATGTCTCGTGC      |
| <b><i>Gapdh</i> - Forward</b> | AGAAGGCTGGGGCTCATTG       |
| <b><i>Gapdh</i> - Reverse</b> | AGGGGCCATCCACAGTCTTC      |

217

218

## 219 2.6 Statistical analyses

220 Non-linear regression was performed on data generated from the concentration-dependent effects  
221 of CBD on cell number in cells transfected with control and viral gene expression plasmids and  
222 used to determine IC<sub>50</sub> values for CBD in combination with each viral gene. Simple linear  
223 regression was performed to determine if the slopes were significantly non-zero. Two-way  
224 analysis of variance (ANOVA) followed by Tukey's post-hoc test for multiple comparisons was  
225 performed to compare early and late apoptosis indexes, and gene expression levels, among cells  
226 transfected with control and viral gene-expression plasmids, with and without various  
227 concentrations of CBD. Analyses were performed using Prism GraphPad 9 software. Data shown  
228 are means ± S.E.M.; n-values denote the number of biological replicates derived from, at a

229 minimum, different passages of cells. Where technical replicates were performed within  
230 experiments, these were averaged to derive single values reported as biological replicates.

## 3. Results

### 3.1 Relative cell numbers

A concentration response curve was generated by treating cells transfected with the control plasmid (pCMV) or plasmids expressing viral genes with vehicle (0.1% EtOH (*i.e.* 0  $\mu$ M CBD)), or with increasing concentrations of CBD (Fig. 1A). The range of concentrations tested was based on pharmacologically achievable blood concentrations observed in human pharmacokinetic studies [50]. The slopes of lines generated from concentration-responses to CBD in cells expressing viral genes were significantly non-zero, indicating a significant relationship between increasing dose of CBD and relative cell number, while the slope of the line for pCMV was not significantly non-zero. IC<sub>50</sub> values for CBD concentrations were 0.89  $\mu$ M for cells expressing *ORF8*, 0.91  $\mu$ M for cells expressing *ORF10*, 0.99  $\mu$ M for cells expressing *M protein*, and 7.24  $\mu$ M for cells transfected with pCMV. At a treatment level of 2  $\mu$ M CBD, relative cell numbers in wells transfected with viral genes were reduced by ~55-80% ( $P < 0.0001$ ) relative to cell numbers in wells transfected with viral genes but not treated with CBD or relative to wells transfected with control plasmid and treated with or without 2  $\mu$ M CBD, among which there were no significant differences.

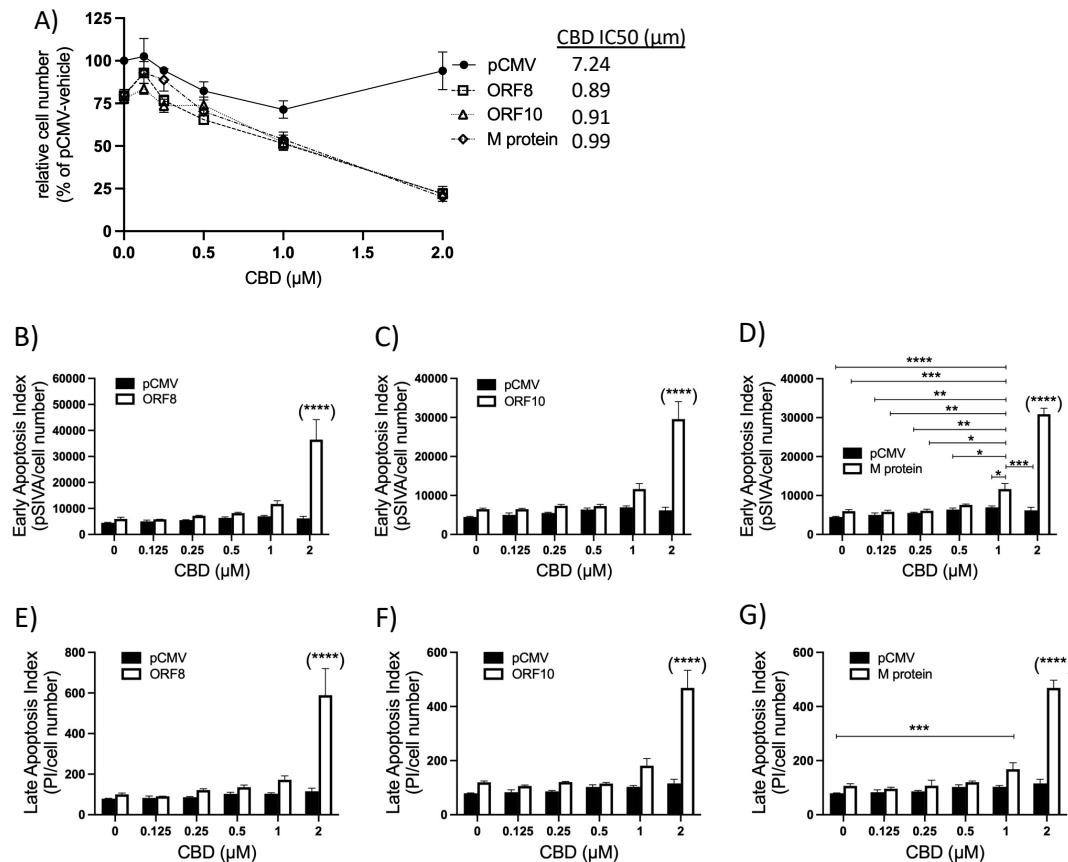

**Fig. 1. Effect of *ORF8*, *ORF10*, or *M protein* expression, with and without CBD treatment,**

**on HEK293 cell number and apoptosis indexes. (A) Dose-dependent effects of CBD on the**

relative number of cells per well 24 h after transfection with control plasmid (pCMV), or

plasmids expressing *ORF8*, *ORF10*, or *M protein* (n=3-12). IC50 values for CBD concentration

in combination with each group are shown. (B-D) Dose-response effect to CBD on the early

apoptosis index in HEK293 cells expressing pCMV or viral genes at 24 h. (E-G) Dose-response

effect to CBD on the late apoptosis index in HEK293 cells transfected with control or viral

plasmids. Apoptotic indexes were calculated by dividing the relative absorption of the respective

marker by the number of cells per well. Apoptosis data were analyzed by 2-way ANOVA with

Tukey's post-hoc test, n=3-9. Differences among groups are as indicated, \*P<0.05, \*\*P<0.01,

\*\*\*P<0.001, \*\*\*\*P<0.0001, where (\*\*\*\*) denotes a significant difference (P<0.0001) between

cells treated with 2  $\mu$ M CBD and transfected with a viral gene-encoding plasmid, and all other groups.

### 3.2 Early and late apoptosis

Differences in cell number can result from changes in cell proliferation, or cell death (*i.e.* apoptosis or necrosis), or both. An initial assessment for changes in cell proliferation indicated no significant effect (*data not shown*), and therefore we focused our studies on apoptosis. A concentration-dependent effect of CBD on the activation of an early marker of apoptosis (pSIVA), and on incorporation of a late marker of apoptosis (PI), was evident in cells expressing *ORF8*, *ORF10*, and *M protein*, but this was not observed in cells transfected only with the control plasmid (Figs. 1B-G). Specific analyses comparing cells transfected with the control vector or plasmids expressing viral genes and treated with increasing levels of CBD demonstrate important effects. First, this analysis shows that CBD alone, even at the highest concentration tested, does not significantly increase markers of apoptosis in control cells. Additionally, it demonstrates that expression of the viral genes *ORF8*, *ORF10*, or *M protein* with vehicle alone (*i.e.* 0  $\mu$ M CBD) also does not significantly increase either early or late apoptosis relative to control cells, indicating a poor ability of cells to detect and respond to the presence of these viral transcripts or proteins in the absence of CBD. Interestingly, however, both early and late apoptosis indexes were significantly elevated in cells expressing any of the viral genes when also treated with 2  $\mu$ M CBD, relative to all other groups. In cells expressing *ORF8*, early and late apoptosis indexes were both increased by over 6-fold in cells treated with 2  $\mu$ M CBD compared to indexes in vehicle alone (Fig. 1B, E). In cells expressing *ORF10* (Fig. 1C, F), early and late



apoptosis indexes were increased ~4.7- and ~4.0-fold, respectively, by 2  $\mu$ M CBD versus vehicle. In cells expressing *M protein* (Fig. 1D, G), early and late apoptosis indexes were increased by ~5.6- and ~4.7-fold in cells expressing *M protein* and treated with 2  $\mu$ M CBD. In addition, significant effects of 1  $\mu$ M CBD were also evident on cells expressing *M protein* (Fig. 1D, G). This concentration generated a significantly elevated late apoptosis index relative to vehicle-treated control cells, and significantly greater early apoptosis indexes relative to most other *M protein*-transfected cells at the same or lower levels of CBD treatment, and all other control-transfected cells treated with or without CBD (Fig. 1D, G).

### 3.3 Expression of *IFN* genes

Expression of *IFN $\alpha$*  and *IFN $\beta$*  was not significantly altered by *ORF8*, *ORF10*, or *M protein*, either with or without 2  $\mu$ M CBD (Fig. 2A-F). However, transfection of these viral genes significantly increased the expression of *IFN $\gamma$* , and this was augmented by 2  $\mu$ M CBD (Fig. 3A-C). In the absence of CBD, transfection of cells with *ORF8*, *ORF10*, or *M protein* caused a significant 16- to 29-fold increase in expression of *IFN $\gamma$*  relative to vehicle-treated control cells, and this effect was augmented by treatment with 2  $\mu$ M CBD, further increasing *IFN $\gamma$*  expression (Fig. 3A-C). Interestingly, however, cells transfected with *ORF8* (in the absence of CBD) did not have higher expression of *IFN $\lambda$ 1* or *IFN $\lambda$ 2/3* than controls, although treatment of cells with 2  $\mu$ M CBD caused a significant induction of *IFN $\lambda$ 1* and *IFN $\lambda$ 2/3* by *ORF8* (Fig. 3D, G). These genes were induced without CBD co-treatment when cells were transfected with *ORF10* (by 9.6-fold and 2.4-fold) (Fig. 3E, H) or *M protein* (by 4.1-fold, for both genes) (Fig. 3F, I) and 2  $\mu$ M CBD strongly augmented the induction of both *IFN $\lambda$ 1* and *IFN $\lambda$ 2/3* that occurred when *ORF10* or *M protein* were transfected, by a further 3.8- to 11.2-fold (Fig. 3 E, F,

H, I). Although relative cell number and apoptosis measures were not significantly affected by 2  $\mu$ M CBD in pCMV-transfected cells, this treatment caused an ~5-fold increase in expression of *IFN $\gamma$*  in pCMV-transfected control cells compared to pCMV-controls cells treated only with vehicle. Similarly, *IFN $\lambda$ 1* and *IFN $\lambda$ 2/3* were increased in pCMV-transfected control cells treated with 2  $\mu$ M CBD by 3-fold and 7-fold, respectively.

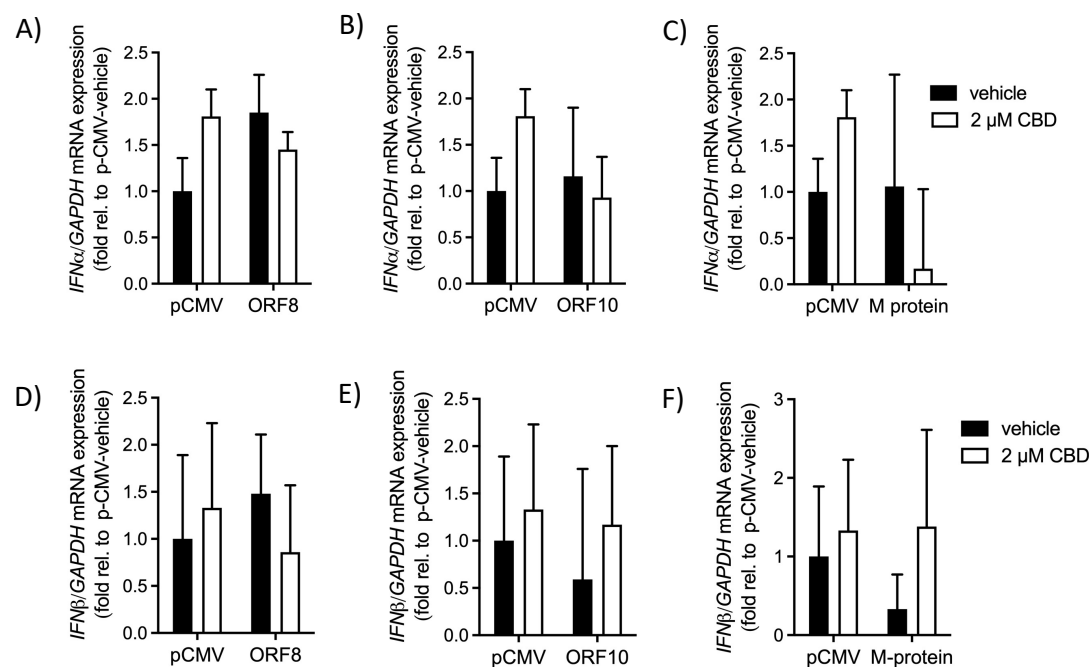

**Fig. 2. Effect of ORF8, ORF10, or M protein, with and without CBD, on gene**

**expression of Type I IFN.** Expression of *IFN $\alpha$*  (A-C) and *IFN $\beta$*  (D-F) in cells

transfected with control plasmid (pCMV), or plasmids expressing *ORF8*, *ORF10*, or *M*

*protein*, and treated with vehicle control (0.1% ethanol) or 2  $\mu$ M CBD for 14 h. Data are

means  $\pm$  SEM (n=5).

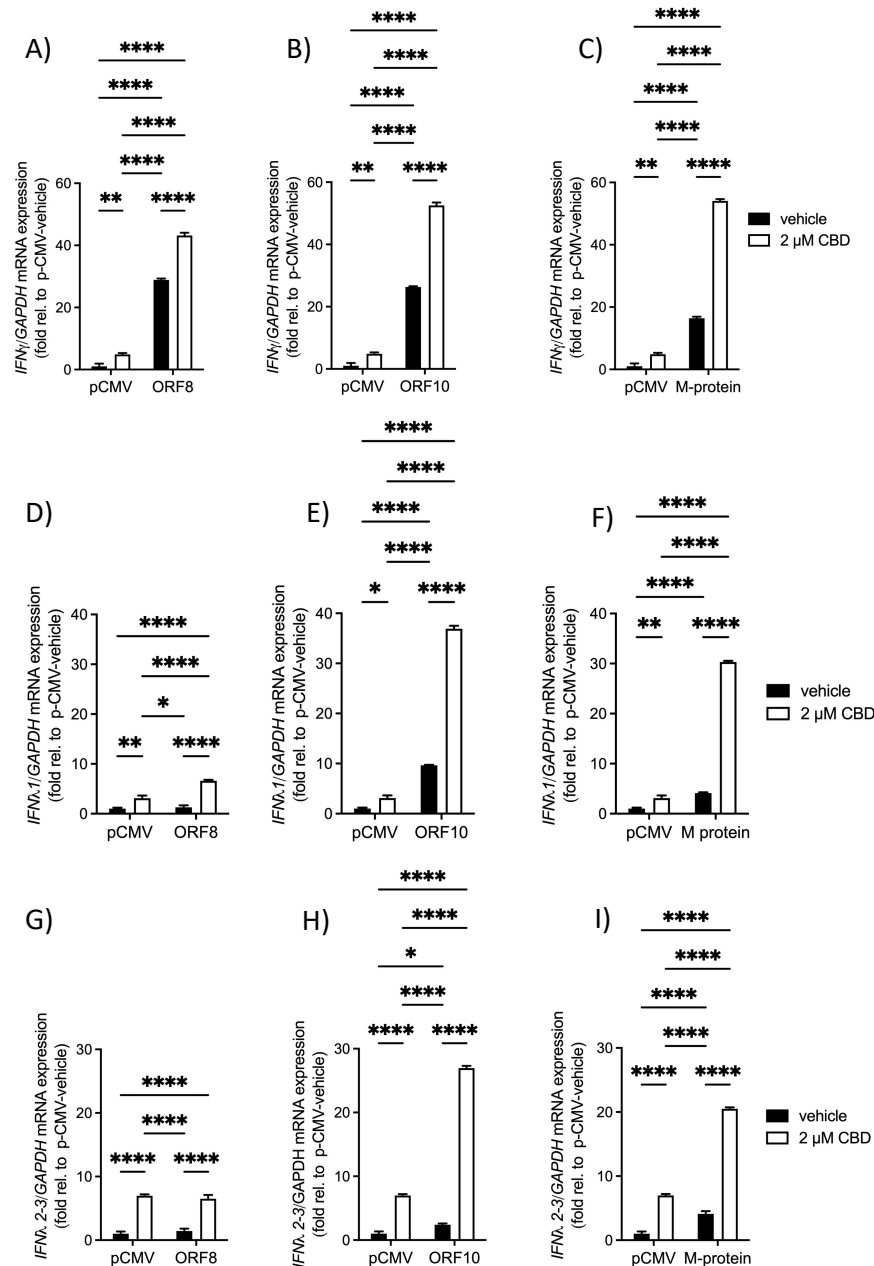

**Fig. 3. Effect of *ORF8*, *ORF10*, or *M protein*, with and without CBD, on gene expression of Type II and III IFN.** Expression of *IFN $\gamma$*  (A-C), *IFN $\lambda$ 1* (D-F), and *IFN $\lambda$ 2/3* (G-I), in cells transfected with control plasmid (pCMV), *ORF8*, *ORF10*, or *M protein*, and treated with vehicle control (0.1% ethanol) or 2  $\mu$ M CBD (n=5) for 14 hours. Data are means  $\pm$  SEM, \*P<0.05, \*\*P<0.01, \*\*\*P<0.001, and \*\*\*\*P<0.0001.

### 3.4 Expression of ISG

Expression of the ISGs *IFIT1* and *MX1* was not significantly altered by treatment with 2  $\mu$ M CBD, or by expression of the SARS-CoV-2 genes *ORF8*, *ORF10*, and *M protein*, either alone, or in combination (Fig. 4A-F). However, significant effects were observed when *OAS* family genes were analyzed. Surprisingly, transfection of *ORF8*, *ORF10*, and *M protein* did not significantly induce expression of *OAS1*, *OAS2*, or *OAS3* relative to cells transfected with pCMV in the absence of CBD (Fig. 5A-I). This indicates that these cells may have a poor ability to recognize and respond to these viral genes through innate immune system activation involving the OAS family. Only *OASL* was significantly induced by *ORF8* (by 17.9-fold), *ORF10* (by 4.9-fold), and *M protein* (by 18.8-fold), in the absence of CBD (Fig. 5J-L). When 2  $\mu$ M CBD was added to cells transfected only with the control plasmid, expression of *OAS2*, *OAS3*, and *OASL* increased significantly (from 5.7 to 7.8-fold). Addition of 2  $\mu$ M CBD to cells transfected with *ORF8*, *ORF10*, or *M protein*, augmented the expression of all *OAS* family genes relative to the corresponding vehicle-treated cells, with the additional induction caused by CBD ranging from 3.1- to 22.9-fold.

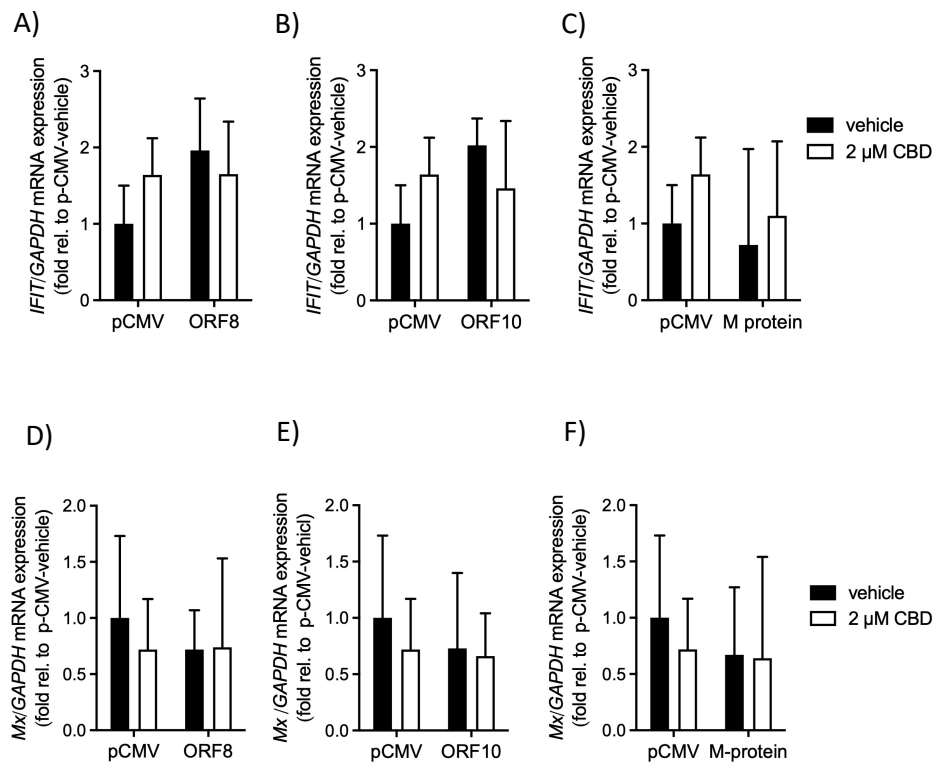

**Fig. 4. Effect of *ORF8*, *ORF10*, or *M protein*, with and without CBD, on gene expression of *MX1* and *IFIT1*.** Expression of *MX1* (A-C) or *IFIT1* (D-F) in cells transfected with control plasmid (pCMV), *ORF8*, *ORF10*, or *M protein*, and treated with vehicle control (0.1% ethanol) or 2 μM CBD for 14 h (n=5). Data are means ± SEM.

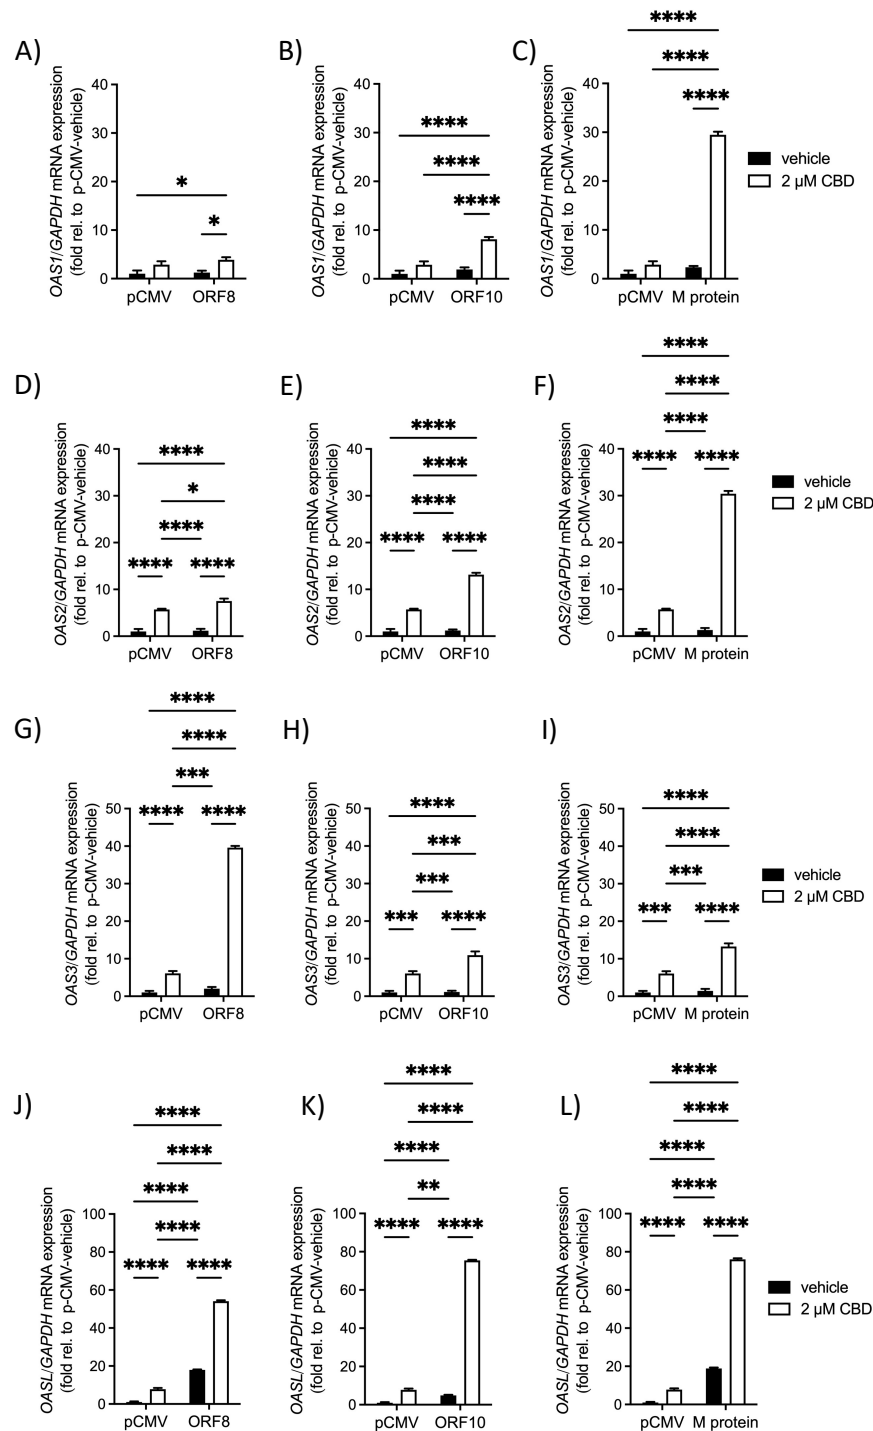

**Fig. 5. Effect of ORF8, ORF10, or M protein, with and without CBD, on gene**

**expression of OAS family members.** Expression of *OAS1* (A-C), *OAS2* (D-F), *OAS3*

(G-I) and *OASL* (J-L) in cells transfected with control plasmid (pCMV), *ORF8*, *ORF10*,

or *M protein*, and treated with vehicle control (0.1% ethanol) or 2  $\mu$ m CBD for 14 h (n=5). Data are means  $\pm$  SEM. \*P<0.05, \*\*\*P<0.001, \*\*\*\*P<0.0001.

#### 4. Discussion

The infectious dose of SARS-CoV-2 required to cause disease in 50% of people exposed has been estimated to be 280 virions [51]. Infection with any virus, including SARS-CoV-2, does not initially cause symptoms. At infection, a small number of virus particles enter cells and ‘hijack’ the cellular machinery to replicate, releasing more infectious particles that amplify the titre. Thus, during peak infection, an individual may have  $10^9$  to  $10^{11}$  virions in their cells and bodily fluids, which can cause symptomatic disease [52, 53]. Factors that prevent viral replication are of significant interest in the COVID-19 pandemic, since they are protective both for individuals and populations. In a host, replication is needed in order for an initial infectious dose to spread within the body, producing symptomatic disease, although asymptomatic SARS-CoV-2 carriers have been reported [54]. Host replication is also needed to produce a sufficient concentration of viral particles for an individual to become infectious to others in a population [54]. Within a population, widespread replication leads to mutations and the generation of novel variants, which can alter the infectivity and virulence of a virus, and potentially reduce the protective efficacy of vaccines [55].

To redirect the cell’s replicative machinery towards viral production, viruses typically encode proteins that can deregulate cell cycle checkpoints. In coronaviruses, including SARS-CoV-1, the nucleocapsid protein inhibits cell cycle progression and cell proliferation by inhibiting activity of cyclin/cyclin-dependent kinase (CDK) complexes [56]. We observed a concentration-dependent decrease in the number of cells per well when cells were transfected

with plasmids expressing *ORF8*, *ORF10*, or *M protein* and treated with CBD, but not when cells were transfected only with the control plasmid. Although we first tested whether expression of *ORF8*, *ORF10* or *M protein* in cells treated CBD would modulate cell proliferation, we did not find any significant differences among groups (*data not shown*). We therefore focused our investigation on a role for these viral genes in modulating apoptosis, which occurs when cells are infected with pathogenic viruses, including SARS-CoV-1 [57] and MERS-CoV [58].

Apoptosis occurs as an outcome of an innate immune response of the cell to viral infection that serves to prevent viral replication and consequently virus spreading and mutation [59]. Cells undergo apoptosis to interrupt the production and release of progeny virus, resulting in early elimination of both the virus and infected cells [60, 61], which may result in the absence of disease, or a milder course of disease, as well as a situation where viral transmission is also prevented or reduced. The induction of apoptosis shortly after exogenous viral genes enter a cell prevents viral genome replication. It is therefore particularly protective against the development of new viral variants, which may potentially arise even in immunized people who can, in some cases, become infected and spread the virus despite vaccination [62].

Interestingly, we found that expression of the SARS-CoV-2 genes *ORF8*, *ORF10*, and *M protein* alone did not significantly induce apoptosis. This is consistent with studies of patients with COVID-19 where the induction of apoptosis was lacking in nasopharyngeal samples [63]. While CBD did not increase apoptosis in control cells, treatment of cells expressing viral genes with a pharmacological dose of CBD significantly augmented the induction of both early and late apoptosis. This finding suggests that CBD may help limit an initial infection by promoting removal of infected cells, thereby limiting the spread, and therefore also likely raising the necessary infectious titre. This is supported by evidence from users of Epidiolex®, a high-dose



pharmaceutical CBD licensed in the United States for use in the treatment of rare types of epilepsy in adults and children [47]. In that study, patients prescribed high-dose CBD had an approximate 10-fold lower risk of testing positive for SARS-CoV-2, even when matched by demographics, recorded diagnoses, and other medications. In those with use of any cannabinoid in their medical record, the positivity rate for SARS-CoV-2 was over 40% lower [47]. Taken together with our findings, this suggests that CBD may provide a prophylactic effect against the risk of contracting SARS-CoV-2 and developing COVID-19 by increasing the initial apoptotic response to viral genes.

We investigated the regulation of *IFN* and *ISG* as a potential mechanism underlying this effect. Prior work has indicated that the SARS-CoV-2 virus can counteract host innate anti-viral responses, resulting in suppression of IFN-mediated responses [23]. Thus, factors that can counteract this are of particular interest. We hypothesized that augmented induction of *IFN* and *ISG* could play a role in the enhanced apoptosis observed in cells expressing viral genes and treated with CBD. Interferons are a family of inducible cytokines with pleiotropic biological effects [64], induced at different time points following infection [25], which help to regulate the innate, intracellular, anti-viral host defense [65]. Type I IFNs tend to slow down proliferation and regulate cell survival, while Type II IFNs also regulate cell survival and proliferation, and Type III IFNs induce cell apoptosis, more so than Types I or II [66]. Inadequate induction of IFNs, and especially lambda-type interferons, has been identified as a factor in SARS-CoV-2 infection leading to more severe disease [67]. The IFN  $\lambda$  family are important inducers of the anti-viral immune response at mucosal surfaces [68], and people with a greater IFN  $\lambda$  induction tend to have less viral inflammation, and may not even develop disease [67].

The lack of induction of Type I *IFN* by either viral gene expression or CBD, suggests that these *IFN* were not involved in the pro-apoptotic response observed. In all comparisons, however, Type II and Type III *IFN* were significantly induced by a combination of viral genes and CBD relative to cells expressing only the viral genes without CBD, and in almost all comparisons, also relative to control cells treated with or without CBD. This was similar to observed effects on early- and late-stage apoptosis, where cells expressing viral genes in combination with 2  $\mu$ M CBD were many fold more effective at inducing apoptosis markers than cells expressing either the viral genes alone, or control plasmid with or without CBD. Although this association between the induction of Type II and III *IFN* and the induction of early- and late-apoptosis is only correlative, it may suggest a possible role for these IFN in mediating observed outcomes.

Analysis of downstream effectors indicated that involvement of *MX1* or *IFIT1* genes was unlikely, although it should be noted that the time course, involving measurements of gene expression preceding apoptosis, may not have captured changes in genes that are typically induced later in the innate immune response [25]. Conversely, *OAS1*, *OAS2*, *OAS3*, and *OASL* family members, which were all significantly elevated in cells expressing viral genes and treated with 2  $\mu$ M CBD compared to vehicle, were likely factors. Surprisingly, however, expression of *ORF8*, *ORF10*, or *M protein* without CBD was insufficient to induce *OAS1*, *OAS2*, or *OAS3* relative to control-transfected cells, in agreement with reports that an inadequate innate immune response of cells to SARS-CoV-2 may be a factor in the pathology of this virus [23]. Of particular note is the finding that control-transfected cells treated with 2  $\mu$ M CBD expressed significantly higher levels of *IFN $\gamma$* , *IFN $\lambda$ 1*, *IFN $\lambda$ 2/3*, and *OAS2*, *OAS3*, and *OASL*, in comparison with control-transfected cells treated only with vehicle, since CBD did not augment

apoptosis or significantly reduce cell numbers in these groups. This raises the intriguing possibility that CBD may prime the innate immune system of cells under normal, non-pathological conditions, by raising basal expression of effectors, so that they are better able to recognize and respond to the presence of viral material, upon infection.

Our finding that CBD regulates OAS family gene expression is particularly interesting, given the role of these enzymes as powerful mediators of virus-associated apoptosis [69-72]. OAS1, OAS2, and OAS3 are part of the IFN-regulated double stranded RNA-activated antiviral pathway [73]. When OAS enzymes detect double stranded RNA, they synthesize 2',5'-oligoadenylates, which then activate RNase L to degrade viral RNA leading to apoptosis and inhibition of virus replication [74-77]. Notably, other coronaviruses besides SARS-CoV-2 have been shown to produce viral proteins that target the degradation of OAS-RNase L pathway proteins, in order to reduce RNase-L activity and inactivate the host defence [78, 79]. OASL has also been suggested to play a role in enhancing antiviral innate immunity [80]. Thus, therapies that can enhance the levels and action of these anti-viral mediators bear a potential for the prevention of SARS-CoV-2 transmission.

Our results demonstrating increased apoptosis in cells treated with CBD and transfected with SARS-CoV-2 viral genes suggests a potential protective effect of CBD at initial infection. However, it also raises the question of whether this could be harmful in an individual who already had a high viral load. Currently, limited information is available on the use of CBD in patients with COVID-19. Based on the anti-inflammatory effects of CBD on the acquired immune system, there have been calls for the use of CBD in COVID-19 patients to treat acute respiratory distress syndrome (ARDS) [81], and to reduce the viral load [82]. In a murine model of ARDS, CBD administration downregulated levels of proinflammatory cytokines, and

ameliorated clinical symptoms [83]. There is medical interest in the use of CBD to treat advanced SARS-CoV-2 infections, with eight clinical trials currently underway [84], including one studying use of CBD treatment for severe and critical COVID-19 pulmonary infection [85]. One trial has recently reported results, indicating no significant effect of 300 mg CBD daily on the clinical evolution of COVID-19 in patients presenting with mild to moderate symptoms, although the authors suggested that future studies should evaluate higher doses, as well as the clinical efficacy of CBD in patients with more severe COVID-19 [86]. Although results have not yet been reported from most other registered clinical trials, none have been stopped prematurely by the medical oversight committees, indicating that findings of significant harm have not been detected. It is therefore possible that CBD may offer prophylaxis against initial viral infection through a pro-apoptotic mechanism that does not result in widespread cell death in highly infected patients. Additional work will be required to understand the nature of CBD effects, in this regard.

## 5. Conclusions

Taken together, our results indicate that while expression of the SARS-CoV-2 genes *ORF8*, *ORF10*, and *M protein* alone fails to significantly induce apoptosis, or reduce cell numbers, and while treatment of cells with up to 2  $\mu$ M CBD also does not affect these parameters, combinations of 2  $\mu$ M CBD with these genes dramatically upregulates apoptosis and reduces cell numbers. A poor ability of cells to sense and respond to the presence of these viral genes may therefore be a factor in the high infectivity rate of SARS-CoV-2. The induction of Type II and Type III *IFN*, as well as *OAS* family member genes, may help explain the pro-apoptotic effect of CBD that was observed in cells expressing viral genes, and future work

should investigate a causal role. In addition, the induction of these *IFN* and *ISG* by CBD in control cells may indicate a ‘priming’ effect on the innate immune system, better readying cells to respond to viral infection, which could help to explain the lower rates of COVID-19 in patients receiving high-dose CBD treatment.

## Acknowledgements

This work was supported by grants from the Natural Sciences and Engineering Research Council of Canada (NSERC) to R.E.D. #RGPIN-2019-05642 and RGPAS-2019-00008, and the Canada Foundation for Innovation—Leader’s Opportunity Fund and Ontario Research Fund (Project No. 30259). MFF was supported by a Mitacs COVID-19 Accelerate Postdoctoral Fellowship. The funders had no role in study design, data collection and analysis, decision to publish, or preparation of the manuscript.

# References

1. Wu F, Zhao S, Yu B, Chen YM, Wang W, Song ZG, et al. A new coronavirus associated with human respiratory disease in China. *Nature*. 2020;579(7798):265-9. Epub 2020/02/06. doi: 10.1038/s41586-020-2008-3. PubMed PMID: 32015508; PubMed Central PMCID: PMC7094943.
2. Coronavirus W-. Worldometer - Coronavirus 2021 [cited 2021 April 27, 2021]. Available from: <https://www.worldometers.info/coronavirus/>.
3. Wu K, Werner AP, Moliva JI, Koch M, Choi A, Stewart-Jones GBE, et al. mRNA-1273 vaccine induces neutralizing antibodies against spike mutants from global SARS-CoV-2 variants. *bioRxiv*. 2021. Epub 2021/01/28. doi: 10.1101/2021.01.25.427948. PubMed PMID: 33501442; PubMed Central PMCID: PMC7836112.
4. Shi PY, Xie X, Zou J, Fontes-Garfias C, Xia H, Swanson K, et al. Neutralization of N501Y mutant SARS-CoV-2 by BNT162b2 vaccine-elicited sera. *Res Sq*. 2021. Epub 2021/01/21. doi: 10.21203/rs.3.rs-143532/v1. PubMed PMID: 33469576; PubMed Central PMCID: PMC7814835.
5. Xie X, Liu Y, Liu J, Zhang X, Zou J, Fontes-Garfias CR, et al. Neutralization of SARS-CoV-2 spike 69/70 deletion, E484K, and N501Y variants by BNT162b2 vaccine-elicited sera. *bioRxiv*. 2021. Epub 2021/02/04. doi: 10.1101/2021.01.27.427998. PubMed PMID: 33532771; PubMed Central PMCID: PMC7852264.
6. Xie X, Liu Y, Liu J, Zhang X, Zou J, Fontes-Garfias CR, et al. Neutralization of SARS-CoV-2 spike 69/70 deletion, E484K and N501Y variants by BNT162b2 vaccine-elicited sera. *Nat Med*. 2021. Epub 2021/02/10. doi: 10.1038/s41591-021-01270-4. PubMed PMID: 33558724.

- 524 7. Xie X, Zou J, Fontes-Garfias CR, Xia H, Swanson KA, Cutler M, et al. Neutralization of  
525 N501Y mutant SARS-CoV-2 by BNT162b2 vaccine-elicited sera. bioRxiv. 2021. Epub  
526 2021/01/15. doi: 10.1101/2021.01.07.425740. PubMed PMID: 33442691; PubMed Central  
527 PMCID: PMCPMC7805448.
- 528 8. Weisblum Y, Schmidt F, Zhang F, DaSilva J, Poston D, Lorenzi JCC, et al. Escape from  
529 neutralizing antibodies by SARS-CoV-2 spike protein variants. bioRxiv. 2020. Epub 2020/08/04.  
530 doi: 10.1101/2020.07.21.214759. PubMed PMID: 32743579; PubMed Central PMCID:  
531 PMCPMC7386497.
- 532 9. Wu F, Zhao S, Yu B, Chen YM, Wang W, Song ZG, et al. Author Correction: A new  
533 coronavirus associated with human respiratory disease in China. Nature. 2020;580(7803):E7.  
534 Epub 2020/04/17. doi: 10.1038/s41586-020-2202-3. PubMed PMID: 32296181; PubMed Central  
535 PMCID: PMCPMC7608129.
- 536 10. Xu J, Zhao S, Teng T, Abdalla AE, Zhu W, Xie L, et al. Systematic Comparison of Two  
537 Animal-to-Human Transmitted Human Coronaviruses: SARS-CoV-2 and SARS-CoV. Viruses.  
538 2020;12(2). Epub 2020/02/27. doi: 10.3390/v12020244. PubMed PMID: 32098422; PubMed  
539 Central PMCID: PMCPMC7077191.
- 540 11. Pancer K, Milewska A, Owczarek K, Dabrowska A, Kowalski M, Łabaj PP, et al. The  
541 SARS-CoV-2 ORF10 is not essential in vitro or in vivo in humans. PLoS Pathog.  
542 2020;16(12):e1008959. Epub 2020/12/11. doi: 10.1371/journal.ppat.1008959. PubMed PMID:  
543 33301543; PubMed Central PMCID: PMCPMC7755277.
- 544 12. Hassan SS, Attrish D, Ghosh S, Choudhury PP, Uversky VN, Aljabali AAA, et al.  
545 Notable sequence homology of the ORF10 protein introspects the architecture of SARS-CoV-2.

Int J Biol Macromol. 2021;181:801-9. Epub 2021/04/17. doi: 10.1016/j.ijbiomac.2021.03.199.  
PubMed PMID: 33862077; PubMed Central PMCID: PMCPMC8051021.

13. Yang DM, Lin FC, Tsai PH, Chien Y, Wang ML, Yang YP, et al. Pandemic analysis of infection and death correlated with genomic Orf10 mutation in SARS-CoV-2 victims. J Chin Med Assoc. 2021. Epub 2021/04/23. doi: 10.1097/jcma.0000000000000542. PubMed PMID: 33883466.

14. Mena EL, Donahue CJ, Vaite LP, Li J, Rona G, O'Leary C, et al. ORF10-Cullin-2-ZYG11B complex is not required for SARS-CoV-2 infection. Proceedings of the National Academy of Sciences of the United States of America. 2021;118(17). Epub 2021/04/09. doi: 10.1073/pnas.2023157118. PubMed PMID: 33827988.

15. Flower TG, Buffalo CZ, Hooy RM, Allaire M, Ren X, Hurley JH. Structure of SARS-CoV-2 ORF8, a rapidly evolving immune evasion protein. Proceedings of the National Academy of Sciences of the United States of America. 2021;118(2). Epub 2020/12/29. doi: 10.1073/pnas.2021785118. PubMed PMID: 33361333; PubMed Central PMCID: PMCPMC7812859.

16. Hassan SS, Aljabali AAA, Panda PK, Ghosh S, Attrish D, Choudhury PP, et al. A unique view of SARS-COV-2 through the lens of ORF8 protein. Comput Biol Med. 2021;133:104380. Epub 2021/04/20. doi: 10.1016/j.compbimed.2021.104380. PubMed PMID: 33872970; PubMed Central PMCID: PMCPMC8049180.

17. Gamage AM, Tan KS, Chan WOY, Liu J, Tan CW, Ong YK, et al. Infection of human Nasal Epithelial Cells with SARS-CoV-2 and a 382-nt deletion isolate lacking ORF8 reveals similar viral kinetics and host transcriptional profiles. PLoS Pathog. 2020;16(12):e1009130.



- 568 Epub 2020/12/08. doi: 10.1371/journal.ppat.1009130. PubMed PMID: 33284849; PubMed  
569 Central PMCID: PMCPMC7746279.
- 570 18. Young BE, Fong SW, Chan YH, Mak TM, Ang LW, Anderson DE, et al. Effects of a  
571 major deletion in the SARS-CoV-2 genome on the severity of infection and the inflammatory  
572 response: an observational cohort study. *Lancet*. 2020;396(10251):603-11. Epub 2020/08/22.  
573 doi: 10.1016/s0140-6736(20)31757-8. PubMed PMID: 32822564; PubMed Central PMCID:  
574 PMCPMC7434477.
- 575 19. Pereira F. SARS-CoV-2 variants combining spike mutations and the absence of ORF8  
576 may be more transmissible and require close monitoring. *Biochemical and biophysical research  
577 communications*. 2021;550:8-14. Epub 2021/03/07. doi: 10.1016/j.bbrc.2021.02.080. PubMed  
578 PMID: 33676232; PubMed Central PMCID: PMCPMC7906533.
- 579 20. Rashid F, Dzakah EE, Wang H, Tang S. The ORF8 protein of SARS-CoV-2 induced  
580 endoplasmic reticulum stress and mediated immune evasion by antagonizing production of  
581 interferon beta. *Virus Res*. 2021;296:198350. Epub 2021/02/25. doi:  
582 10.1016/j.virusres.2021.198350. PubMed PMID: 33626380; PubMed Central PMCID:  
583 PMCPMC7897408.
- 584 21. Lin X, Fu B, Yin S, Li Z, Liu H, Zhang H, et al. ORF8 contributes to cytokine storm  
585 during SARS-CoV-2 infection by activating IL-17 pathway. *iScience*. 2021;24(4):102293. Epub  
586 2021/03/17. doi: 10.1016/j.isci.2021.102293. PubMed PMID: 33723527; PubMed Central  
587 PMCID: PMCPMC7942160.
- 588 22. Li JY, Liao CH, Wang Q, Tan YJ, Luo R, Qiu Y, et al. The ORF6, ORF8 and  
589 nucleocapsid proteins of SARS-CoV-2 inhibit type I interferon signaling pathway. *Virus Res*.

2020;286:198074. Epub 2020/06/27. doi: 10.1016/j.virusres.2020.198074. PubMed PMID: 32589897; PubMed Central PMCID: PMCPMC7309931.

23. Banerjee AK, Blanco MR, Bruce EA, Honson DD, Chen LM, Chow A, et al. SARS-CoV-2 Disrupts Splicing, Translation, and Protein Trafficking to Suppress Host Defenses. *Cell*. 2020;183(5):1325-39.e21. Epub 2020/10/21. doi: 10.1016/j.cell.2020.10.004. PubMed PMID: 33080218; PubMed Central PMCID: PMCPMC7543886.

24. Lee HC, Chathuranga K, Lee JS. Intracellular sensing of viral genomes and viral evasion. *Exp Mol Med*. 2019;51(12):1-13. Epub 2019/12/13. doi: 10.1038/s12276-019-0299-y. PubMed PMID: 31827068; PubMed Central PMCID: PMCPMC6906418.

25. Lee AJ, Ashkar AA. The Dual Nature of Type I and Type II Interferons. *Front Immunol*. 2018;9:2061. Epub 2018/09/27. doi: 10.3389/fimmu.2018.02061. PubMed PMID: 30254639; PubMed Central PMCID: PMCPMC6141705.

26. Ashkar AA, Rosenthal KL. Interleukin-15 and natural killer and NKT cells play a critical role in innate protection against genital herpes simplex virus type 2 infection. *J Virol*. 2003;77(18):10168-71. Epub 2003/08/28. doi: 10.1128/jvi.77.18.10168-10171.2003. PubMed PMID: 12941930; PubMed Central PMCID: PMCPMC224591.

27. Broggi A, Granucci F, Zanoni I. Type III interferons: Balancing tissue tolerance and resistance to pathogen invasion. *J Exp Med*. 2020;217(1). Epub 2019/12/11. doi: 10.1084/jem.20190295. PubMed PMID: 31821443; PubMed Central PMCID: PMCPMC7037241.

28. Li W, Lewis-Antes A, Huang J, Balan M, Kotenko SV. Regulation of apoptosis by type III interferons. *Cell Prolif*. 2008;41(6):960-79. Epub 2008/12/02. doi: 10.1111/j.1365-2184.2008.00558.x. PubMed PMID: 19040572; PubMed Central PMCID: PMCPMC6496378.

- 613 29. Stanifer ML, Kee C, Cortese M, Zumaran CM, Triana S, Mukenhirn M, et al. Critical  
614 Role of Type III Interferon in Controlling SARS-CoV-2 Infection in Human Intestinal Epithelial  
615 Cells. *Cell Rep.* 2020;32(1):107863. Epub 2020/07/02. doi: 10.1016/j.celrep.2020.107863.  
616 PubMed PMID: 32610043; PubMed Central PMCID: PMC7303637.
- 617 30. Fukuda Y, Homma T, Inoue H, Onitsuka C, Ikeda H, Goto Y, et al. Downregulation of  
618 type III interferons in patients with severe COVID-19. *J Med Virol.* 2021. Epub 2021/04/04. doi:  
619 10.1002/jmv.26993. PubMed PMID: 33811680.
- 620 31. Liu MQ, Zhou DJ, Wang X, Zhou W, Ye L, Li JL, et al. IFN- $\lambda$ 3 inhibits HIV infection of  
621 macrophages through the JAK-STAT pathway. *PloS one.* 2012;7(4):e35902. Epub 2012/05/05.  
622 doi: 10.1371/journal.pone.0035902. PubMed PMID: 22558263; PubMed Central PMCID:  
623 PMCPMC3338759.
- 624 32. Palma-Ocampo HK, Flores-Alonso JC, Vallejo-Ruiz V, Reyes-Leyva J, Flores-Mendoza  
625 L, Herrera-Camacho I, et al. Interferon lambda inhibits dengue virus replication in epithelial  
626 cells. *Virol J.* 2015;12:150. Epub 2015/09/29. doi: 10.1186/s12985-015-0383-4. PubMed PMID:  
627 26411318; PubMed Central PMCID: PMC4584467.
- 628 33. Schwartz SL, Conn GL. RNA regulation of the antiviral protein 2'-5'-oligoadenylate  
629 synthetase. *Wiley Interdiscip Rev RNA.* 2019;10(4):e1534. Epub 2019/04/17. doi:  
630 10.1002/wrna.1534. PubMed PMID: 30989826; PubMed Central PMCID: PMC6585406.
- 631 34. Gusho E, Baskar D, Banerjee S. New advances in our understanding of the "unique"  
632 RNase L in host pathogen interaction and immune signaling. *Cytokine.* 2020;133:153847. Epub  
633 2016/09/07. doi: 10.1016/j.cyto.2016.08.009. PubMed PMID: 27595182; PubMed Central  
634 PMCID: PMC7128181.

35. Li J, Boix E. Host Defence RNases as Antiviral Agents against Enveloped Single Stranded RNA Viruses. *Virulence*. 2021;12(1):444-69. Epub 2021/03/05. doi: 10.1080/21505594.2021.1871823. PubMed PMID: 33660566; PubMed Central PMCID: PMC7939569.
36. Glanz A, Chakravarty S, Varghese M, Kottapalli A, Fan S, Chakravarti R, et al. Transcriptional and Non-Transcriptional Activation, Posttranslational Modifications, and Antiviral Functions of Interferon Regulatory Factor 3 and Viral Antagonism by the SARS-Coronavirus. *Viruses*. 2021;13(4). Epub 2021/04/04. doi: 10.3390/v13040575. PubMed PMID: 33805458; PubMed Central PMCID: PMC8066409.
37. Polčic P, Mentel M, Gavurníková G, Bhatia-Kiššová I. To keep the host alive - the role of viral Bcl-2 proteins. *Acta Virol*. 2017;61(3):240-51. Epub 2017/09/01. doi: 10.4149/av\_2017\_302. PubMed PMID: 28854788.
38. Samuel MA, Whitby K, Keller BC, Marri A, Barchet W, Williams BR, et al. PKR and RNase L contribute to protection against lethal West Nile Virus infection by controlling early viral spread in the periphery and replication in neurons. *J Virol*. 2006;80(14):7009-19. Epub 2006/07/01. doi: 10.1128/jvi.00489-06. PubMed PMID: 16809306; PubMed Central PMCID: PMC1489062.
39. Li Y, Renner DM, Comar CE, Whelan JN, Reyes HM, Cardenas-Diaz FL, et al. SARS-CoV-2 induces double-stranded RNA-mediated innate immune responses in respiratory epithelial-derived cells and cardiomyocytes. *Proceedings of the National Academy of Sciences of the United States of America*. 2021;118(16). Epub 2021/04/04. doi: 10.1073/pnas.2022643118. PubMed PMID: 33811184.

- 657 40. Zhou S, Butler-Laporte G, Nakanishi T, Morrison DR, Afilalo J, Afilalo M, et al. A  
658 Neanderthal OAS1 isoform protects individuals of European ancestry against COVID-19  
659 susceptibility and severity. *Nature medicine*. 2021;27(4):659-67. Epub 2021/02/27. doi:  
660 10.1038/s41591-021-01281-1. PubMed PMID: 33633408.
- 661 41. Zheng Y, Zhuang MW, Han L, Zhang J, Nan ML, Zhan P, et al. Severe acute respiratory  
662 syndrome coronavirus 2 (SARS-CoV-2) membrane (M) protein inhibits type I and III interferon  
663 production by targeting RIG-I/MDA-5 signaling. *Signal Transduct Target Ther*. 2020;5(1):299.  
664 Epub 2020/12/30. doi: 10.1038/s41392-020-00438-7. PubMed PMID: 33372174; PubMed  
665 Central PMCID: PMCPMC7768267.
- 666 42. Mecha M, Feliú A, Iñigo PM, Mestre L, Carrillo-Salinas FJ, Guaza C. Cannabidiol  
667 provides long-lasting protection against the deleterious effects of inflammation in a viral model  
668 of multiple sclerosis: a role for A2A receptors. *Neurobiology of disease*. 2013;59:141-50. Epub  
669 2013/07/16. doi: 10.1016/j.nbd.2013.06.016. PubMed PMID: 23851307.
- 670 43. O'Sullivan SE, Stevenson CW, Laviolette SR. Could Cannabidiol Be a Treatment for  
671 Coronavirus Disease-19-Related Anxiety Disorders? *Cannabis Cannabinoid Res*. 2021;6(1):7-18.  
672 Epub 2021/02/23. doi: 10.1089/can.2020.0102. PubMed PMID: 33614948; PubMed Central  
673 PMCID: PMCPMC7891214.
- 674 44. Sarkar I, Sen G, Bhattachariya M, Bhattacharyya S, Sen A. In silico inquest reveals the  
675 efficacy of Cannabis in the treatment of post-Covid-19 related neurodegeneration. *J Biomol*  
676 *Struct Dyn*. 2021:1-10. Epub 2021/04/04. doi: 10.1080/07391102.2021.1905556. PubMed  
677 PMID: 33810774.
- 678 45. Kozela E, Pietr M, Juknat A, Rimmerman N, Levy R, Vogel Z. Cannabinoids Delta(9)-  
679 tetrahydrocannabinol and cannabidiol differentially inhibit the lipopolysaccharide-activated NF-

680 kappaB and interferon-beta/STAT proinflammatory pathways in BV-2 microglial cells. *J Biol*  
681 *Chem.* 2010;285(3):1616-26. Epub 2009/11/17. doi: 10.1074/jbc.M109.069294. PubMed PMID:  
682 19910459; PubMed Central PMCID: PMCPMC2804319.

683 46. Mechoulam R, Peters M, Murillo-Rodriguez E, Hanus LO. Cannabidiol--recent advances.  
684 *Chem Biodivers.* 2007;4(8):1678-92. Epub 2007/08/23. doi: 10.1002/cbdv.200790147. PubMed  
685 PMID: 17712814.

686 47. Nguyen LC, Yang D, Nicolaescu V, Best TJ, Ohtsuki T, Chen SN, et al. Cannabidiol  
687 Inhibits SARS-CoV-2 Replication and Promotes the Host Innate Immune Response. *bioRxiv.*  
688 2021. Epub 2021/03/25. doi: 10.1101/2021.03.10.432967. PubMed PMID: 33758843; PubMed  
689 Central PMCID: PMCPMC7987002.

690 48. Duncan RE, Lau D, El-Sohemy A, Archer MC. Geraniol and beta-ionone inhibit  
691 proliferation, cell cycle progression, and cyclin-dependent kinase 2 activity in MCF-7 breast  
692 cancer cells independent of effects on HMG-CoA reductase activity. *Biochemical pharmacology.*  
693 2004;68(9):1739-47. doi: 10.1016/j.bcp.2004.06.022. PubMed PMID: 15450939.

694 49. M'Hiri I, Diaguarachchige De Silva KH, Duncan RE. Relative expression and regulation  
695 by short-term fasting of lysophosphatidic acid receptors and autotaxin in white and brown  
696 adipose tissue depots. *Lipids.* 2020;55(3):279-84. Epub 2020/02/19. doi: 10.1002/lipd.12224.  
697 PubMed PMID: 32069377.

698 50. Chan JZ, Duncan RE. Regulatory Effects of Cannabidiol on Mitochondrial Functions: A  
699 Review. *Cells.* 2021;10(5). Epub 2021/06/03. doi: 10.3390/cells10051251. PubMed PMID:  
700 34069407; PubMed Central PMCID: PMCPMC8159073.

701 51. Watanabe T, Bartrand TA, Weir MH, Omura T, Haas CN. Development of a dose-  
702 response model for SARS coronavirus. *Risk Anal.* 2010;30(7):1129-38. Epub 2010/05/26. doi:

703 10.1111/j.1539-6924.2010.01427.x. PubMed PMID: 20497390; PubMed Central PMCID:  
704 PMCPMC7169223.

705 52. Sender R, Bar-On YM, Flamholz A, Gleizer S, Bernsthein B, Phillips R, et al. The total  
706 number and mass of SARS-CoV-2 virions in an infected person. medRxiv. 2020. Epub  
707 2020/11/26. doi: 10.1101/2020.11.16.20232009. PubMed PMID: 33236021; PubMed Central  
708 PMCID: PMCPMC7685332.

709 53. Cohen FS. How Viruses Invade Cells. Biophys J. 2016;110(5):1028-32. Epub  
710 2016/03/10. doi: 10.1016/j.bpj.2016.02.006. PubMed PMID: 26958878; PubMed Central  
711 PMCID: PMCPMC4788752.

712 54. Murata T, Sakurai A, Suzuki M, Komoto S, Ide T, Ishihara T, et al. Shedding of Viable  
713 Virus in Asymptomatic SARS-CoV-2 Carriers. mSphere. 2021;6(3). Epub 2021/05/21. doi:  
714 10.1128/mSphere.00019-21. PubMed PMID: 34011679.

715 55. Mahmoodpoor A, Sanaie S, Samadi P, Yousefi M, Nader ND. SARS-CoV-2: Unique  
716 Challenges of the Virus and Vaccines. Immunol Invest. 2021:1-8. Epub 2021/06/11. doi:  
717 10.1080/08820139.2021.1936009. PubMed PMID: 34109900; PubMed Central PMCID:  
718 PMCPMC8204310.

719 56. Surjit M, Liu B, Chow VT, Lal SK. The nucleocapsid protein of severe acute respiratory  
720 syndrome-coronavirus inhibits the activity of cyclin-cyclin-dependent kinase complex and  
721 blocks S phase progression in mammalian cells. The Journal of biological chemistry.  
722 2006;281(16):10669-81. Epub 2006/01/25. doi: 10.1074/jbc.M509233200. PubMed PMID:  
723 16431923.

724 57. Zhang L, Wei L, Jiang D, Wang J, Cong X, Fei R. SARS-CoV nucleocapsid protein  
725 induced apoptosis of COS-1 mediated by the mitochondrial pathway. Artif Cells Blood Substit

726 Immobil Biotechnol. 2007;35(2):237-53. Epub 2007/04/25. doi: 10.1080/10731190601188422.  
727 PubMed PMID: 17453707.

728 58. Yeung ML, Yao Y, Jia L, Chan JF, Chan KH, Cheung KF, et al. MERS coronavirus  
729 induces apoptosis in kidney and lung by upregulating Smad7 and FGF2. Nat Microbiol.  
730 2016;1:16004. Epub 2016/08/31. doi: 10.1038/nmicrobiol.2016.4. PubMed PMID: 27572168;  
731 PubMed Central PMCID: PMC7097571.

732 59. Rus F, Morlock K, Silverman N, Pham N, Kotwal GJ, Marshall WL. Characterization of  
733 poxvirus-encoded proteins that regulate innate immune signaling pathways. Methods Mol Biol.  
734 2012;890:273-88. Epub 2012/06/13. doi: 10.1007/978-1-61779-876-4\_16. PubMed PMID:  
735 22688773.

736 60. Thompson CB. Apoptosis in the pathogenesis and treatment of disease. Science.  
737 1995;267(5203):1456-62. Epub 1995/03/10. doi: 10.1126/science.7878464. PubMed PMID:  
738 7878464.

739 61. Thomson BJ. Viruses and apoptosis. Int J Exp Pathol. 2001;82(2):65-76. Epub  
740 2001/07/17. doi: 10.1111/j.1365-2613.2001.iep0082-0065-x. PubMed PMID: 11454099;  
741 PubMed Central PMCID: PMC7097571.

742 62. Rubin R. COVID-19 Vaccines vs Variants-Determining How Much Immunity Is Enough.  
743 JAMA : the journal of the American Medical Association. 2021;325(13):1241-3. Epub  
744 2021/03/18. doi: 10.1001/jama.2021.3370. PubMed PMID: 33729423.

745 63. Islam A, Khan MA, Ahmed R, Hossain MS, Kabir SMT, Islam MS, et al. Transcriptome  
746 of nasopharyngeal samples from COVID-19 patients and a comparative analysis with other  
747 SARS-CoV-2 infection models reveal disparate host responses against SARS-CoV-2. J Transl



748 Med. 2021;19(1):32. Epub 2021/01/09. doi: 10.1186/s12967-020-02695-0. PubMed PMID:  
749 33413422; PubMed Central PMCID: PMC7790360.

750 64. Chawla-Sarkar M, Lindner DJ, Liu YF, Williams BR, Sen GC, Silverman RH, et al.  
751 Apoptosis and interferons: role of interferon-stimulated genes as mediators of apoptosis.  
752 Apoptosis. 2003;8(3):237-49. Epub 2003/05/27. doi: 10.1023/a:1023668705040. PubMed PMID:  
753 12766484.

754 65. Durbin RK, Kotenko SV, Durbin JE. Interferon induction and function at the mucosal  
755 surface. Immunol Rev. 2013;255(1):25-39. Epub 2013/08/21. doi: 10.1111/imr.12101. PubMed  
756 PMID: 23947345; PubMed Central PMCID: PMC5972370.

757 66. Stanifer ML, Pervolaraki K, Boulant S. Differential Regulation of Type I and Type III  
758 Interferon Signaling. Int J Mol Sci. 2019;20(6). Epub 2019/03/25. doi: 10.3390/ijms20061445.  
759 PubMed PMID: 30901970; PubMed Central PMCID: PMC6471306.

760 67. Andreacos E, Tsiodras S. COVID-19: lambda interferon against viral load and  
761 hyperinflammation. EMBO Mol Med. 2020;12(6):e12465. Epub 2020/04/26. doi:  
762 10.15252/emmm.202012465. PubMed PMID: 32333818; PubMed Central PMCID:  
763 PMCPMC7267110.

764 68. Ye L, Schnepf D, Staeheli P. Interferon-lambda orchestrates innate and adaptive mucosal  
765 immune responses. Nat Rev Immunol. 2019;19(10):614-25. Epub 2019/06/16. doi:  
766 10.1038/s41577-019-0182-z. PubMed PMID: 31201377.

767 69. Castelli J, Wood KA, Youle RJ. The 2-5A system in viral infection and apoptosis.  
768 Biomed Pharmacother. 1998;52(9):386-90. Epub 1998/12/18. doi: 10.1016/s0753-  
769 3322(99)80006-7. PubMed PMID: 9856285.

70. Castelli JC, Hassel BA, Maran A, Paranjape J, Hewitt JA, Li XL, et al. The role of 2'-5' oligoadenylate-activated ribonuclease L in apoptosis. *Cell Death Differ.* 1998;5(4):313-20. Epub 1999/04/14. doi: 10.1038/sj.cdd.4400352. PubMed PMID: 10200477.
71. Flodstrom-Tullberg M, Hultcrantz M, Stotland A, Maday A, Tsai D, Fine C, et al. RNase L and double-stranded RNA-dependent protein kinase exert complementary roles in islet cell defense during coxsackievirus infection. *J Immunol.* 2005;174(3):1171-7. Epub 2005/01/22. doi: 10.4049/jimmunol.174.3.1171. PubMed PMID: 15661870.
72. Stone VM, Ringqvist EE, Larsson PG, Domsgen E, Holmlund U, Sverremark-Ekstrom E, et al. Inhibition of Type III Interferon Expression in Intestinal Epithelial Cells-A Strategy Used by Coxsackie B Virus to Evade the Host's Innate Immune Response at the Primary Site of Infection? *Microorganisms.* 2021;9(1). Epub 2021/01/21. doi: 10.3390/microorganisms9010105. PubMed PMID: 33466313; PubMed Central PMCID: PMC7824802.
73. Li Y, Banerjee S, Goldstein SA, Dong B, Gaughan C, Rath S, et al. Ribonuclease L mediates the cell-lethal phenotype of double-stranded RNA editing enzyme ADAR1 deficiency in a human cell line. *Elife.* 2017;6. Epub 2017/04/01. doi: 10.7554/eLife.25687. PubMed PMID: 28362255; PubMed Central PMCID: PMC5404912.
74. Dong B, Xu L, Zhou A, Hassel BA, Lee X, Torrence PF, et al. Intrinsic molecular activities of the interferon-induced 2-5A-dependent RNase. *J Biol Chem.* 1994;269(19):14153-8. Epub 1994/05/13. PubMed PMID: 7514601.
75. Hovanessian AG, Justesen J. The human 2'-5'oligoadenylate synthetase family: unique interferon-inducible enzymes catalyzing 2'-5' instead of 3'-5' phosphodiester bond formation. *Biochimie.* 2007;89(6-7):779-88. Epub 2007/04/06. doi: 10.1016/j.biochi.2007.02.003. PubMed PMID: 17408844.

793 76. Zhou S, Butler-Laporte G, Nakanishi T, Morrison DR, Afilalo J, Afilalo M, et al. A  
794 Neanderthal OAS1 isoform protects individuals of European ancestry against COVID-19  
795 susceptibility and severity. *Nat Med.* 2021. Epub 2021/02/27. doi: 10.1038/s41591-021-01281-1.  
796 PubMed PMID: 33633408.

797 77. Silverman RH, Weiss SR. Viral phosphodiesterases that antagonize double-stranded  
798 RNA signaling to RNase L by degrading 2-5A. *J Interferon Cytokine Res.* 2014;34(6):455-63.  
799 Epub 2014/06/07. doi: 10.1089/jir.2014.0007. PubMed PMID: 24905202; PubMed Central  
800 PMCID: PMCPMC4046343.

801 78. Zhao L, Jha BK, Wu A, Elliott R, Ziebuhr J, Gorbalenya AE, et al. Antagonism of the  
802 interferon-induced OAS-RNase L pathway by murine coronavirus ns2 protein is required for  
803 virus replication and liver pathology. *Cell Host Microbe.* 2012;11(6):607-16. Epub 2012/06/19.  
804 doi: 10.1016/j.chom.2012.04.011. PubMed PMID: 22704621; PubMed Central PMCID:  
805 PMCPMC3377938.

806 79. Zhang R, Jha BK, Ogden KM, Dong B, Zhao L, Elliott R, et al. Homologous 2',5'-  
807 phosphodiesterases from disparate RNA viruses antagonize antiviral innate immunity. *Proc Natl*  
808 *Acad Sci U S A.* 2013;110(32):13114-9. Epub 2013/07/24. doi: 10.1073/pnas.1306917110.  
809 PubMed PMID: 23878220; PubMed Central PMCID: PMCPMC3740845.

810 80. Zhu J, Ghosh A, Sarkar SN. OASL-a new player in controlling antiviral innate immunity.  
811 *Curr Opin Virol.* 2015;12:15-9. Epub 2015/02/14. doi: 10.1016/j.coviro.2015.01.010. PubMed  
812 PMID: 25676874; PubMed Central PMCID: PMCPMC4470762.

813 81. Nagarkatti P, Miranda K, Nagarkatti M. Use of Cannabinoids to Treat Acute Respiratory  
814 Distress Syndrome and Cytokine Storm Associated with Coronavirus Disease-2019. *Front*

815 Pharmacol. 2020;11:589438. Epub 2020/11/27. doi: 10.3389/fphar.2020.589438. PubMed  
816 PMID: 33240092; PubMed Central PMCID: PMC7677512.

817 82. Pluskota-Karwatka D, Hoffmann M, Barciszewski J. Reducing SARS-CoV-2  
818 Pathological Protein Activity with Small Molecules. J Pharm Anal. 2021. Epub 2021/04/13. doi:  
819 10.1016/j.jpha.2021.03.012. PubMed PMID: 33842018; PubMed Central PMCID:  
820 PMCPMC8020608.

821 83. Khodadadi H, Salles É L, Jarrahi A, Chibane F, Costigliola V, Yu JC, et al. Cannabidiol  
822 Modulates Cytokine Storm in Acute Respiratory Distress Syndrome Induced by Simulated Viral  
823 Infection Using Synthetic RNA. Cannabis Cannabinoid Res. 2020;5(3):197-201. Epub  
824 2020/09/15. doi: 10.1089/can.2020.0043. PubMed PMID: 32923657; PubMed Central PMCID:  
825 PMCPMC7480719.

826 84. clinicaltrials.gov. Clinical Trials - CBD and COVID-19 2021. Available from:  
827 [https://clinicaltrials.gov/ct2/results?cond=&term=cannabidiol+and+covid-](https://clinicaltrials.gov/ct2/results?cond=&term=cannabidiol+and+covid-19&cntry=&state=&city=&dist=)  
828 [19&cntry=&state=&city=&dist=](https://clinicaltrials.gov/ct2/results?cond=&term=cannabidiol+and+covid-19&cntry=&state=&city=&dist=).

829 85. trials.gov c. Cannabidiol Treatment for Severe and Critical Coronavirus (COVID-19)  
830 Pulmonary Infection 2021 [cited 2021 July 1, 2021]. Available from:  
831 <https://clinicaltrials.gov/ct2/show/NCT04731116>.

832 86. Crippa JAS, Pacheco JC, Zuardi AW, Guimaraes FS, Campos AC, Osorio FD, Loureiro  
833 SR, Dos Santos RG, Souza JDS, Ushirohira JM, Ferreira RR, Mancini Costa KC, Scomparin DS,  
834 Scarante FF, Pires-Dos-Santos I, Mechoulam R, Kapczinski F, Fonseca BAL, Esposito DLA,  
835 Passos ADC, Dal Fabbro AL, Bellissimo-Rodrigues F, Arruda E, Scarpelini S, Andraus MH,  
836 Nather Junior JC, Wada DT, Koenigkam-Santos M, Santos AC, Busatto Filho G, and Hallak  
837 JEC. Cannabidiol for COVID-19 Patients with Mild to Moderate Symptoms (CANDIDATE

838 Study): A Randomized, Double-Blind, Placebo-Controlled Clinical Trial. Cannabis Cannabinoid  
839 Res. 2021; Oct 7. doi: 10.1089/can.2021.0093. PubMed PMID: 34619044.  
840
